# Supplementary material for: Butyrate Lowers Cellular Cholesterol through HDAC Inhibition and Impaired SREBP-2 Signalling
Source: MDPI journal article supplement (doi:10.3390/ijms232415506), 2022-12-07
Supplement: s1 [file s1]

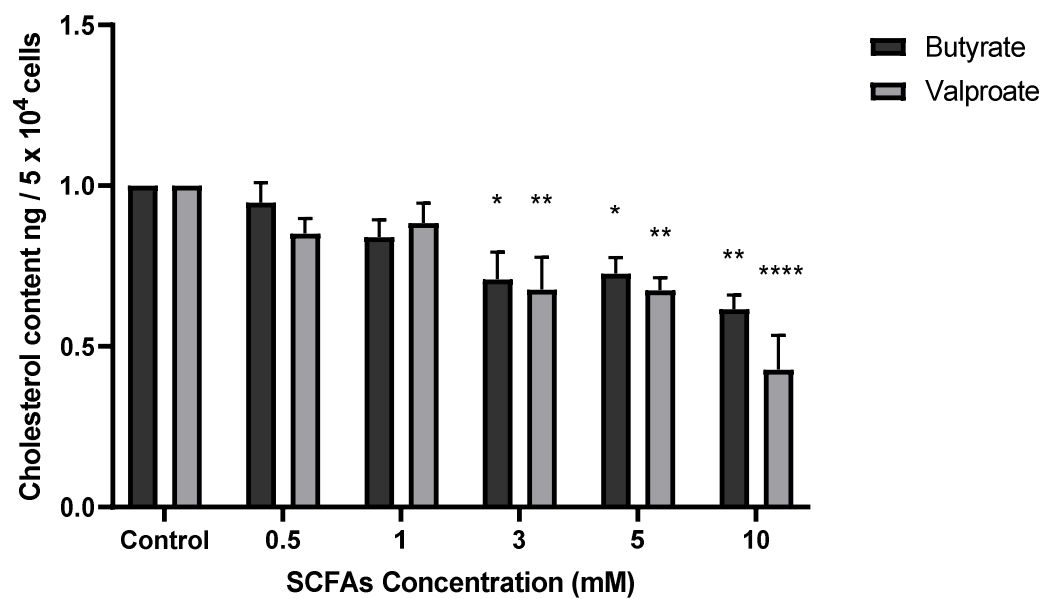

**Figure S1.** Cellular cholesterol content of HepG2 cells treated with varying concentrations of butyrate or valproate for 24 h. Results represent the mean combined from at least three independent experiments, with error bars representing SEMs. \*  $p < 0.05$ , \*\*  $p < 0.01$ , \*\*\*\*  $p < 0.0001$ .

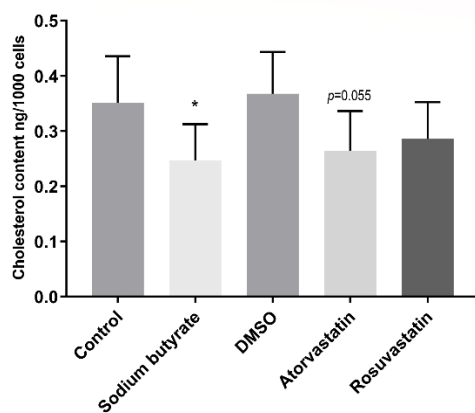

(a)

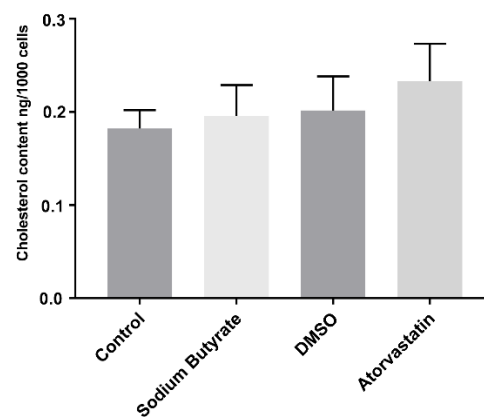

(b)

**Figure S2.** (a) Cellular cholesterol content of BRIN-BD11 cells; (b) Cholesterol content of THP1 cells. Cells were treated with 10  $\mu$ M statins or 5 mM sodium butyrate for 24 h. \*  $p < 0.05$ .

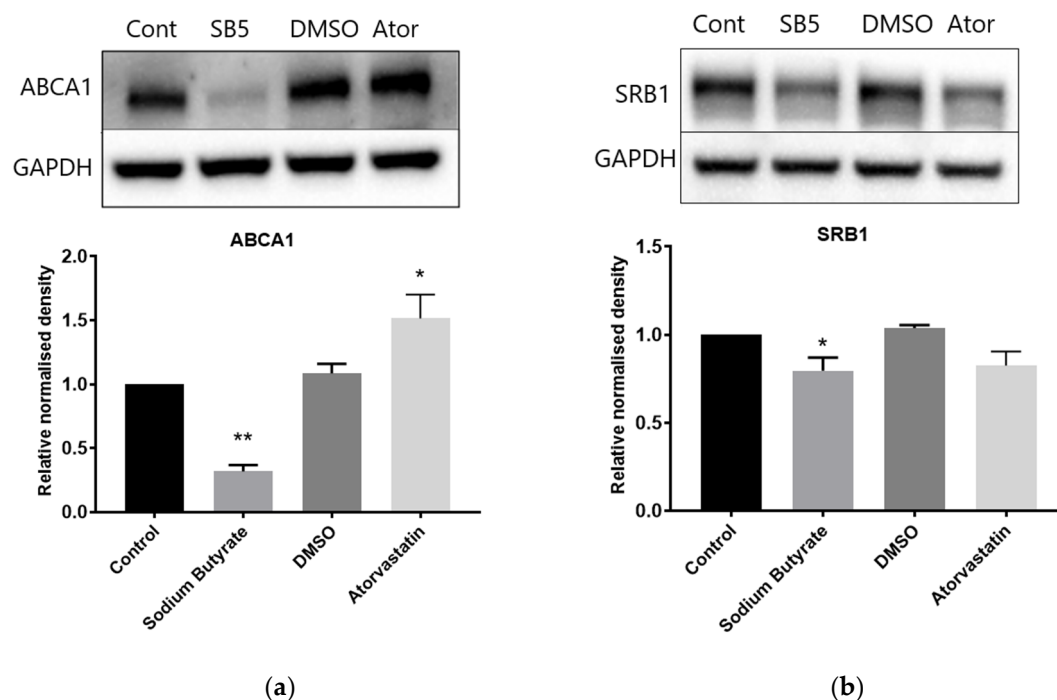

**Figure S3.** (a) Immunoblot of ABCA1 in HepG2 cells in HLPs; (b) Immunoblot of SRB1 in HepG2 cells in HLPs. Cells were treated with 1 mM (SB1) or 5 mM (SB5) sodium butyrate, or 10  $\mu$ M atorvastatin for 24 h in media containing HLPs. The graphs represent the mean density readings as normalised to GAPDH from three independent experiments, with error bars representing SEMs. \*  $p < 0.05$ , \*\*  $p < 0.01$  compared to control.

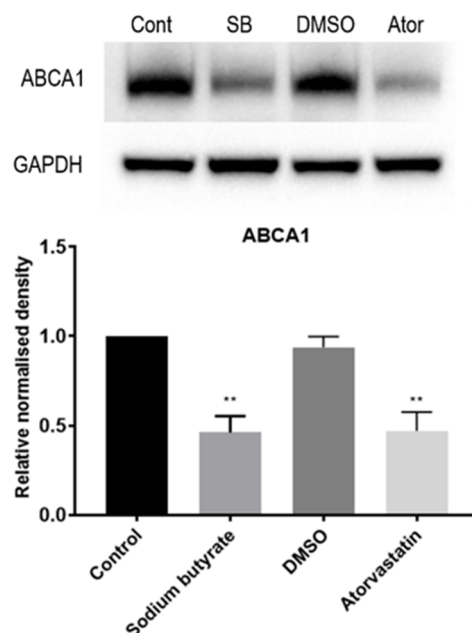

**Figure S4.** Immunoblot of ABCA1 in THP-1 cells. Cells were treated with 5 mM sodium butyrate or 10  $\mu$ M atorvastatin for 24 h. The graph represents the mean combined density readings as normalised to GAPDH from three independent experiments with error bars representing SEMs. \*\*  $p < 0.01$ .

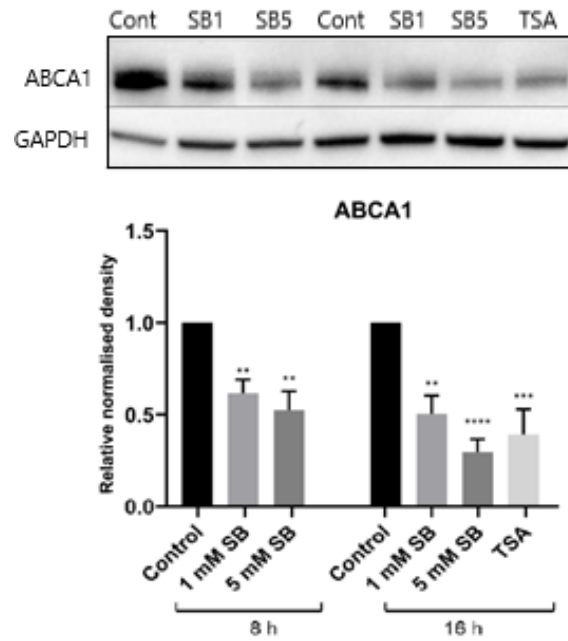

**Figure S5.** Immunoblot of ABCA1 in HepG2 cells. Cells were treated with 1 mM (SB1) and 5 mM (SB5) sodium butyrate for 8 h and 16 h or TSA for 16 h. The graph represents the mean density readings as normalised to GAPDH from three independent experiments, with error bars representing SEMs. \*\*  $p < 0.01$ , \*\*\*  $p < 0.001$ , \*\*\*\*  $p < 0.0001$ .

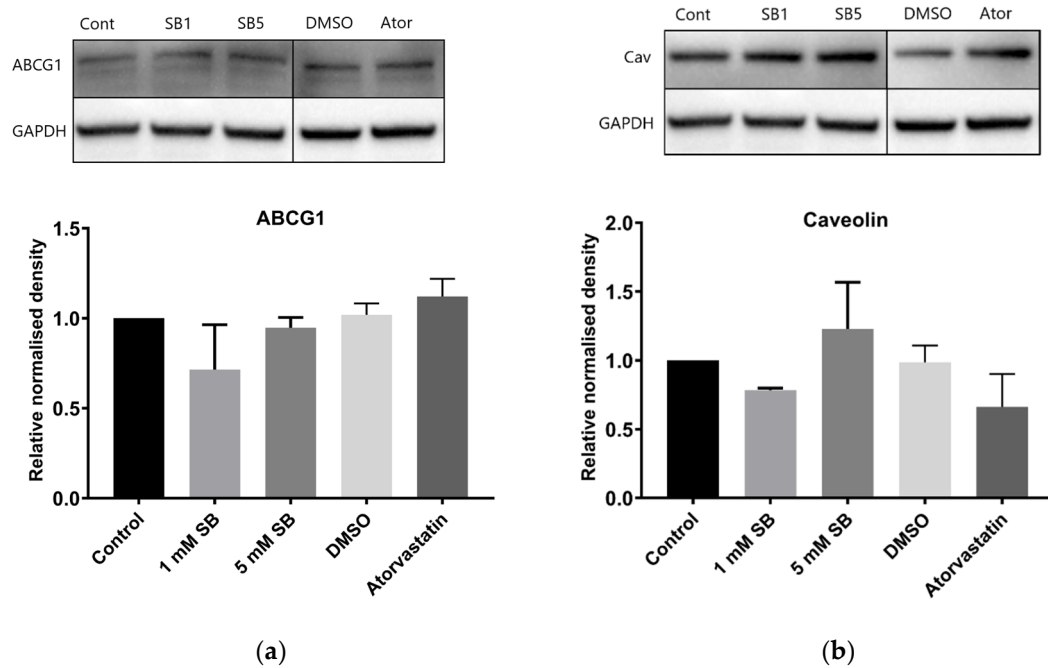

**Figure S6.** (a) Immunoblot of ABCG1 in HepG2 cells; (b) immunoblot of caveolin in HepG2 cells. Cells were treated with 1 mM (SB1) or 5 mM (SB5) sodium butyrate, or 10  $\mu$ M atorvastatin for 24 h in media containing HLPs. The graphs represent the mean density readings as normalised to GAPDH from three independent experiments, with error bars representing SEMs.

**Table S1.** Primers for qPCR experiments

| <b>Target</b> | <b>Forward primer</b>  | <b>Reverse primer</b>  | <b>Annealing temp</b> |
|---------------|------------------------|------------------------|-----------------------|
| <i>GAPDH</i>  | ACAGTTGCCATGTAGACC     | TTGAGCACGGGTACTTTA     | 57-60°                |
| <i>YWHAZ</i>  | AACTTGACATTGTGGACATC   | AAAAC TATTTGTGGGACAGC  | 57-63°                |
| <i>RPL13A</i> | GTCTGAAGCCTACAAGAAAG   | TGTCAATTTTCTTCTCCACG   | 61-63°                |
| <i>LDLR</i>   | GAGGACAAAGTATTTTGGACAG | G TAGGTTTT CAGCCAACAAG | 57°                   |
| <i>PPARG</i>  | AAAGAAGCCAACACTAAACC   | TGGTCATTTTCGTTAAAGGC   | 63°                   |
| <i>SREBF2</i> | CAGCAGGTCAATCATAAACTG  | GGACATTCTGATTAAAGTCCTC | 61.4°                 |
| <i>NR1H3</i>  | CATGACCGACTGATG TTC    | CAAACACTTGCTCTGAGTG    | 61.4°                 |
| <i>APOA1</i>  | AGGAGTACACTAAGAAGCTC   | AAACGTTTATTCTGAGCACC   | 62°                   |
| <i>APOB</i>   | CTTACATCCTGAACATCAAGAG | AGTTTCCATACACGGTATCC   | 63°                   |
| <i>HMGCR</i>  | ACTTCGTGTTTCATGACTTTC  | GACATAATCATCTTGACCCTC  | 59°                   |
| <i>SREBF1</i> | AATCTGGGTTTTGTGTCTTC   | AAAAGTTGTGTACCTTG TGG  | 61.4°                 |
| <i>CAV1</i>   | CAGGGACATCTCTACACC     | TCAAAGTCAATCTTGACCAC   | 61.4°                 |
| <i>CYP7A1</i> | AAATCTACCCAGACCCTTTG   | TTCCAGGACATATTGTAGCTC  | 58°                   |
| <i>ABCG1</i>  | GAGGTGAACCCTTTTCTTTG   | CCTTTCTCAACCCCTTTAATC  | 60°                   |
| <i>MVK</i>    | CATGTTGTCAGAAGTCCTAC   | CTCAAGTTCAAGGATACAGC   | 59°                   |
| <i>ABCA1</i>  | GTGTTTCTGGATGAACCC     | TTCCATTGACCATGATTGC    | 62°                   |
| <i>SCARB1</i> | ACAAAAGCAACATCACCTTC   | TGGGCTTATTCTCCATCATC   | 62°                   |
